# Supplementary material
Source: PubMed Central journal article supplement (PMC3364924)

## Reardon et al., Supplemental Data

**Supplemental Table S1.** Sequences of primers for Real-time RT-PCR.

| Primer        | Sequence of forward and reverse primers 5'-3'       |
|---------------|-----------------------------------------------------|
| <i>Wnt4</i>   | CATCGAGGAGTGCCAATACCA<br>GGAGGGAGTCCAGTGTGGAA       |
| <i>Wnt5a</i>  | GGCGAGCTGTCTACCTGTGG<br>GGCGAACGGGTGACCATAGT        |
| <i>Wnt7a</i>  | TGAAGAGGACCCAGTGACAGG<br>GGCGTACTGGTGTGTGTTGT       |
| <i>Wnt7b</i>  | TGAGGCGGGCAGAAAGG<br>CCTGACACACCGTGACACTTACA        |
| <i>Wnt11</i>  | GCCATGAAGGCCTGCCGTAG<br>GATGGTGTGACTGATGGTGG        |
| <i>Wnt16</i>  | CCAAGGAGACAGCATTTCATTTATG<br>CTGCATGACCTGGTGACAGAGT |
| <i>Fzd6</i>   | GCGGCGTTTGGCTTCGTT<br>CACAGAGGCAGAAGGACGAAGT        |
| <i>Fzd10</i>  | TGCTCTGACCGGCTTCGT<br>GATGAAGGAAGTGCCGATGAC         |
| <i>Hoxa10</i> | TGCCCTTACACGAAGCACCA<br>GCTCCCGGATTCGGTTTTCT        |
| <i>Hoxa11</i> | AGTCGTCTTCCGGCCACACT<br>TTGACGGTCCGGTGAGGTTGA       |
| <i>Msx1</i>   | AAGCAGTACCTGTCTATTG<br>GATCTTCACCTGGGTCTC           |
| <i>Msx2</i>   | GGTCAAGTCGGAAAATTC<br>GTGGGGCTCATATGTCTG            |
| <i>Vangl2</i> | GGTCGTGCGATCCACAGATG<br>ACGGACTTGGGCAGGTTGAG        |
| <i>Foxa2</i>  | ACCTGAGTCCGAGTCTGAGC<br>AGCGTCAGCATCTTGTTGG         |
| <i>Gapdh</i>  | CAACTACATGGTCTACATGTTC<br>CTCGCTCCTGGAAGATG         |

### **Supplemental Figure Legends**

Supplemental Figure S1. Analysis of conditional ablation of *Cdh1* in the mouse uterus at 5-weeks-old. (A) Uterine histology of *Cdh1<sup>ff</sup>* and *Cdh1<sup>d/d</sup>* mice. Tissues were stained using hematoxylin and eosin. Legend: GE, glandular epithelium; LE, luminal epithelium; M, myometrium; S, stroma. (B) Gland numbers per section and *Foxa2* mRNA levels in the uteri of *Cdh1<sup>ff</sup>* and *Cdh1<sup>d/d</sup>* mice. The results represent the mean  $\pm$  SEM (*Cdh1<sup>ff</sup>* vs *Cdh1<sup>d/d</sup>* \* P<0.001).

Supplemental Figure S2. Analysis of conditional ablation of *Cdh1* in the mouse ovary and oviduct at 5-weeks-old. Tissues were stained using hematoxylin and eosin. No differences in histoarchitecture of the ovary and oviduct were observed between *Cdh1<sup>ff</sup>* and *Cdh1<sup>d/d</sup>* mice.

Supplemental Figure 1

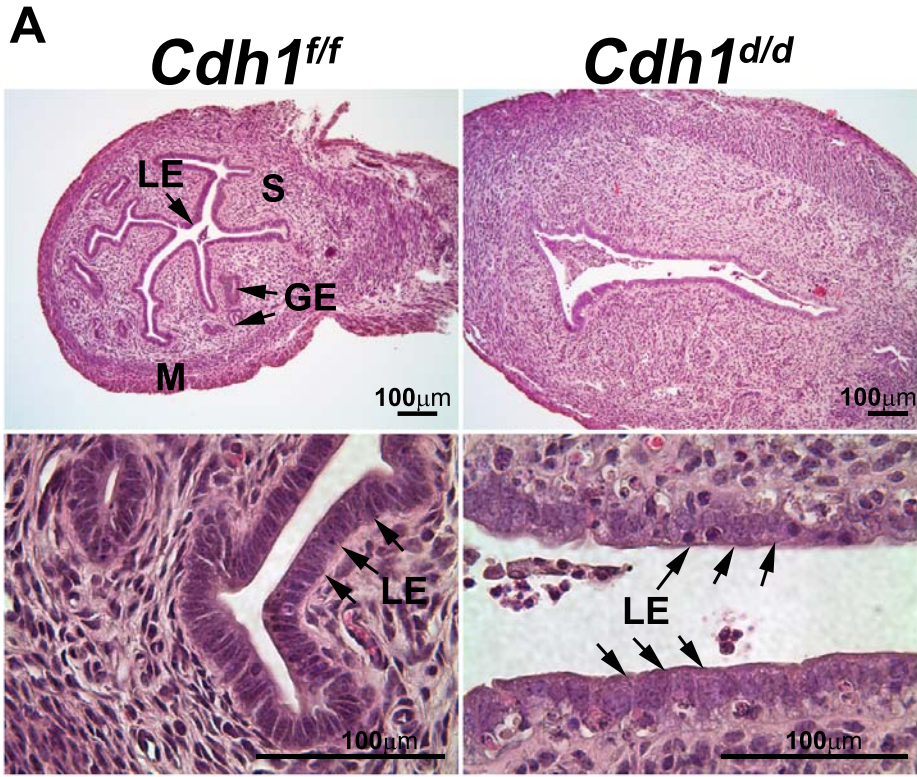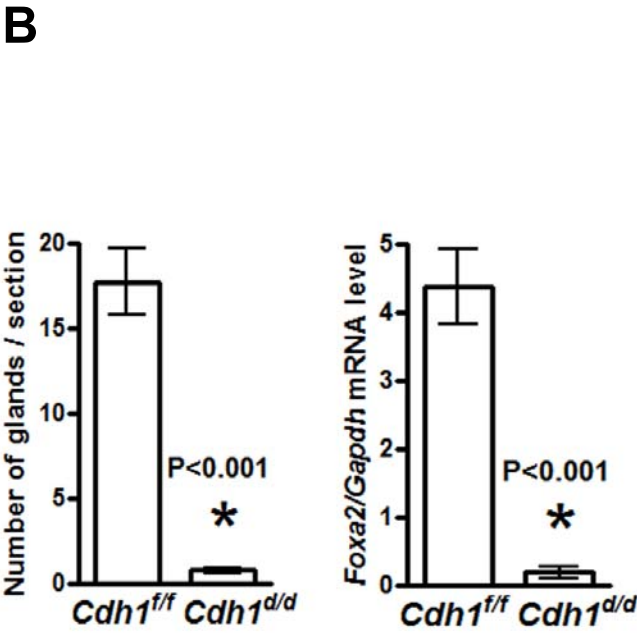

Supplemental Figure 2

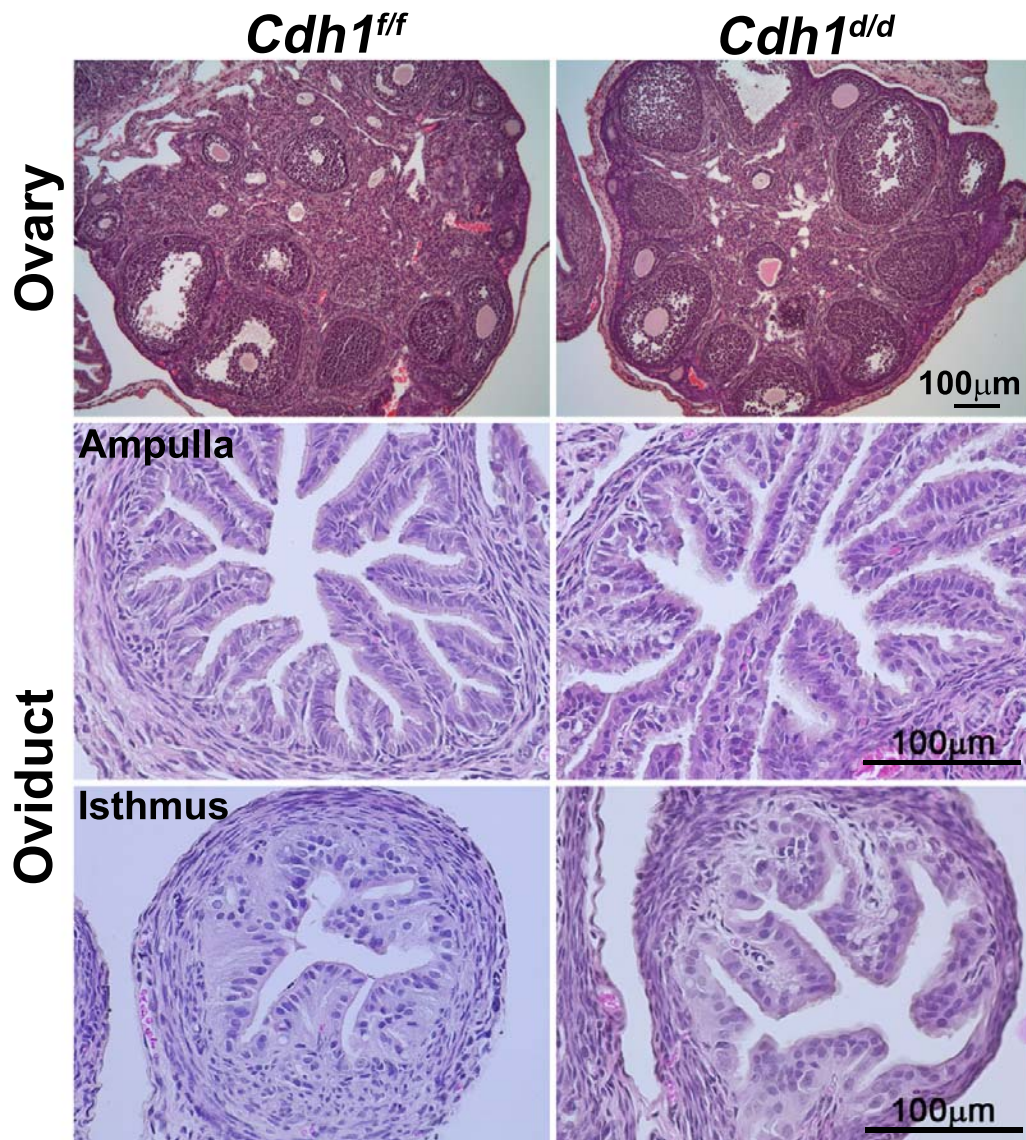

Supplement: supp_112.098871_biolreprod.112.098871-1.pdf [file supp_112.098871_biolreprod.112.098871-1.pdf]
